# Supplementary material
Source: publisher figshare collection journal article supplement (https://gsajournals.figshare.com/ndownloader/files/24099518)
Supplement: Supplementary file 1 [file 24099518]

Supplemental Table 2: Primers and restriction enzymes used for genetic mapping analysis

| Chr.  *I* | marker | position (kb) | primers | restriction enzyme | Bristol digest (bp) | Hawaiian digest (bp) | DCO confirmation | Bristol digest (bp) | Hawaiian digest (bp) |
| --- | --- | --- | --- | --- | --- | --- | --- | --- | --- |
|  | A | 825 | F: CCTACAACAGGCAAAGAAGC | *Ssp*I | 643 | 324, 319 | repeat |  |  |
|  |  |  | R: AATTCCTACCAAAGCTCCGC |  |  |  |  |  |  |
|  | B | 2690 | F: TAATGTACCACCTCACGTGACG | *Bst*BI | 348 | 188, 160 | *Xmn*I | 348 | 158, 192 |
|  |  |  | R: CTTTCACCAGAACCCTCTATTC |  |  |  |  |  |  |
|  | C | 6351 | F: ATCATTCTCCAGGCCACGTTAC | *Nde*I | 594 | 300, 294 | repeat |  |  |
|  |  |  | R: CTGAACTAGTCGAACAAACCCC |  |  |  |  |  |  |
|  | D | 12606 | F: CTTGGTGTGGGGAGAGTATAGG | *Sau*3AI | 303, 63 | 207, 96, 63 | *Mnl*I | 15, 156, 196 | 15, 352 |
|  |  |  | R: TTTGTCCGGATTGACTCTGC |  |  |  |  |  |  |
|  | E | 14950 | F: CACAAGTGGTTTGGAAGTACCG | *Hind*III | 450 | 236, 214 | *Alu*I | 168, 283 | 168, 70, 213 |
|  |  |  | R: CAACAAAGGGATAGATCACGGG |  |  |  |  |  |  |
| Chr.  *V* | A | 537 | F: CCGCACTTCCTTCAGAAATG | *Bam*HI | 318 | 268, 50 | *Alw*I | 318 | 263, 43 |
|  |  |  | R: TGTAGGGCGAGTAACCAAGC |  |  |  |  |  |  |
|  | B | 6043 | F: GTTGTGAAAGTCGCGTTGAG | *Bsp*HI | 320, 207 | 527 | *Hpy188*III | 319, 208 | 527 |
|  |  |  | R: TTCGGTGTGTTGTCTGTAGTCG |  |  |  |  |  |  |
|  | C | 11998 | F: TTTCAGCTAGACCTCCCATG | *Hpy188*III | 578 | 326, 252 | repeat |  |  |
|  |  |  | R: ATCAATCACATGATGCCGT |  |  |  |  |  |  |
|  | D | 16578 | F: TTCATGACAAGCATCCAGTGTC | *Hpy*CH4IV | 215, 33 | 197, 33, 18 | *Bsa*AI | 219, 30 | 198, 21, 30 |
|  |  |  | R: AGCCGGGTAGAGAGCTAAAGTG |  |  |  |  |  |  |
|  | E | 20760 | F: TCCCCTCTACCAGATGCCTT | *Dra*I | 374, 101 | 475 | repeat |  |  |
|  |  |  | R: ACTGCTAGCTCAAATACTCCCA |  |  |  |  |  |  |
